# Supplementary material for: A Family of Ethyl N-Salicylideneglycinate Dyes Stabilized by Intramolecular Hydrogen Bonding: Photophysical Properties and Computational Study
Source: MDPI journal article supplement (doi:10.3390/molecules26113112), 2021-05-23
Supplement: s1 [file s1]

## Supplementary Information

# A Family of Ethyl *N*-salicylidene-glycinate Dyes Stabilized by Intramolecular Hydrogen Bonding: Photophysical Properties and Computational Study

Larisa E. Alkhimova <sup>1</sup>, Maria G. Babashkina <sup>2</sup> and Damir A. Safin <sup>1,3,4,\*</sup>

<sup>1</sup> University of Tyumen, Volodarskogo Str. 6, 625003 Tyumen, Russia

<sup>2</sup> Institute of Condensed Matter and Nanosciences, Université Catholique de Louvain, Place L. Pasteur 1, 1348 Louvain-la-Neuve, Belgium; maria.babashkina@gmail.com

<sup>3</sup> Kurgan State University, Sovetskaya Str. 63/4, Kurgan 640020, Russia

<sup>4</sup> Innovation Center for Chemical and Pharmaceutical Technologies, Ural Federal University named after the First President of Russia B.N. Eltsin, Mira Str. 19, Ekaterinburg 620002, Russian Federation

\* Correspondence: l.e.alkhim@gmail.com (L.E.A.); damir.a.safin@gmail.com (D.A.S.)

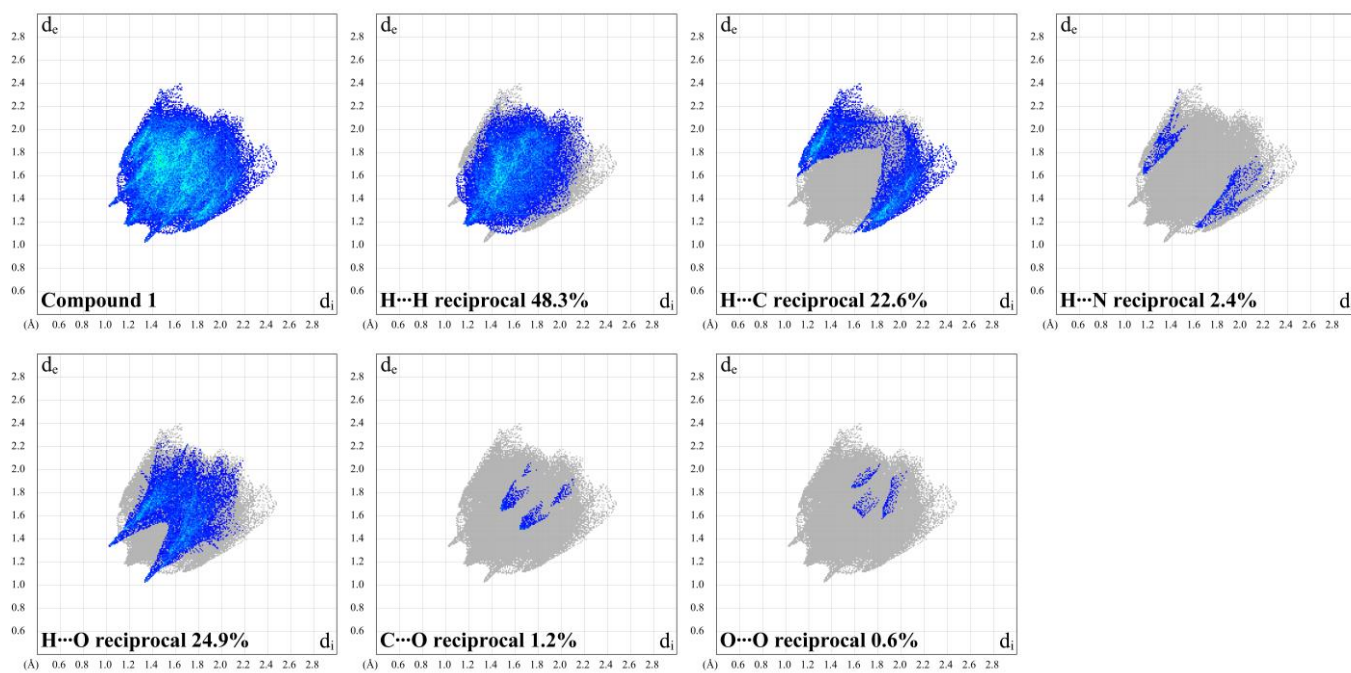

**Figure S1.** 2D and decomposed 2D fingerprint plots of observed contacts for the crystal structure of **1**.

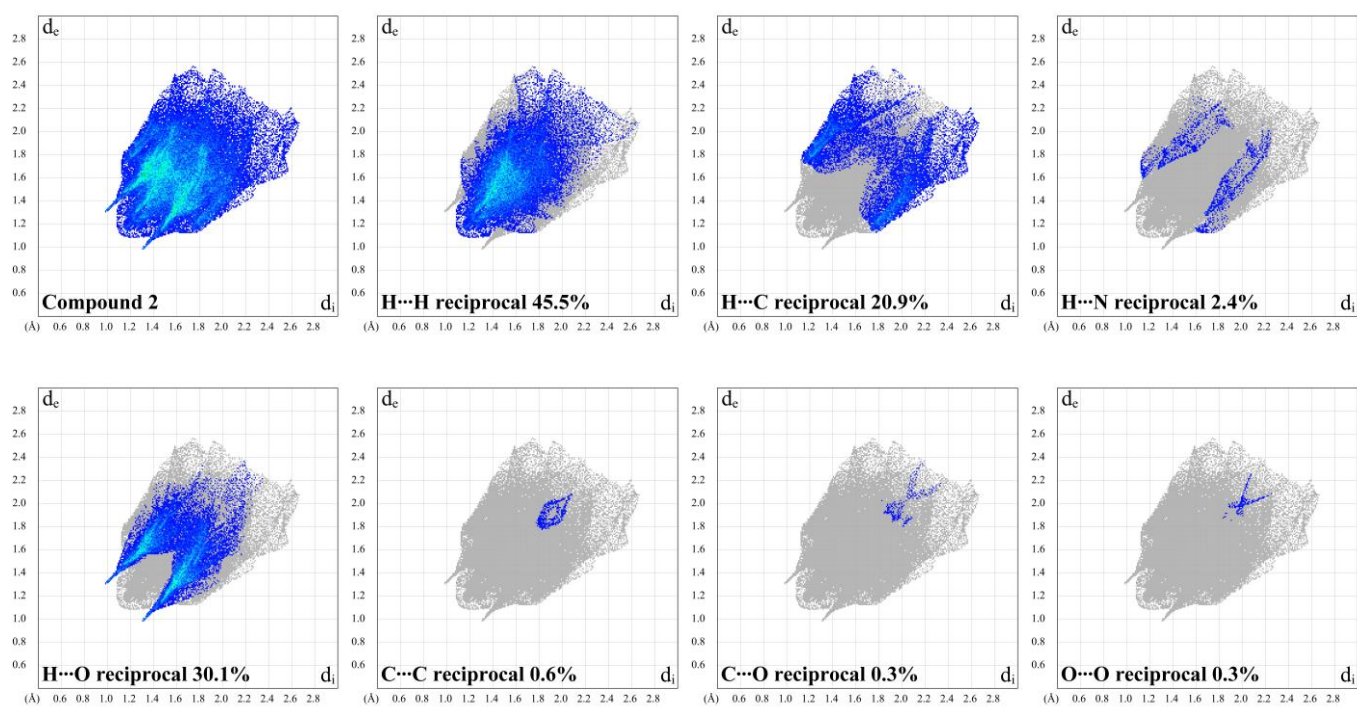

**Figure S2.** 2D and decomposed 2D fingerprint plots of observed contacts for the crystal structure of **2**.

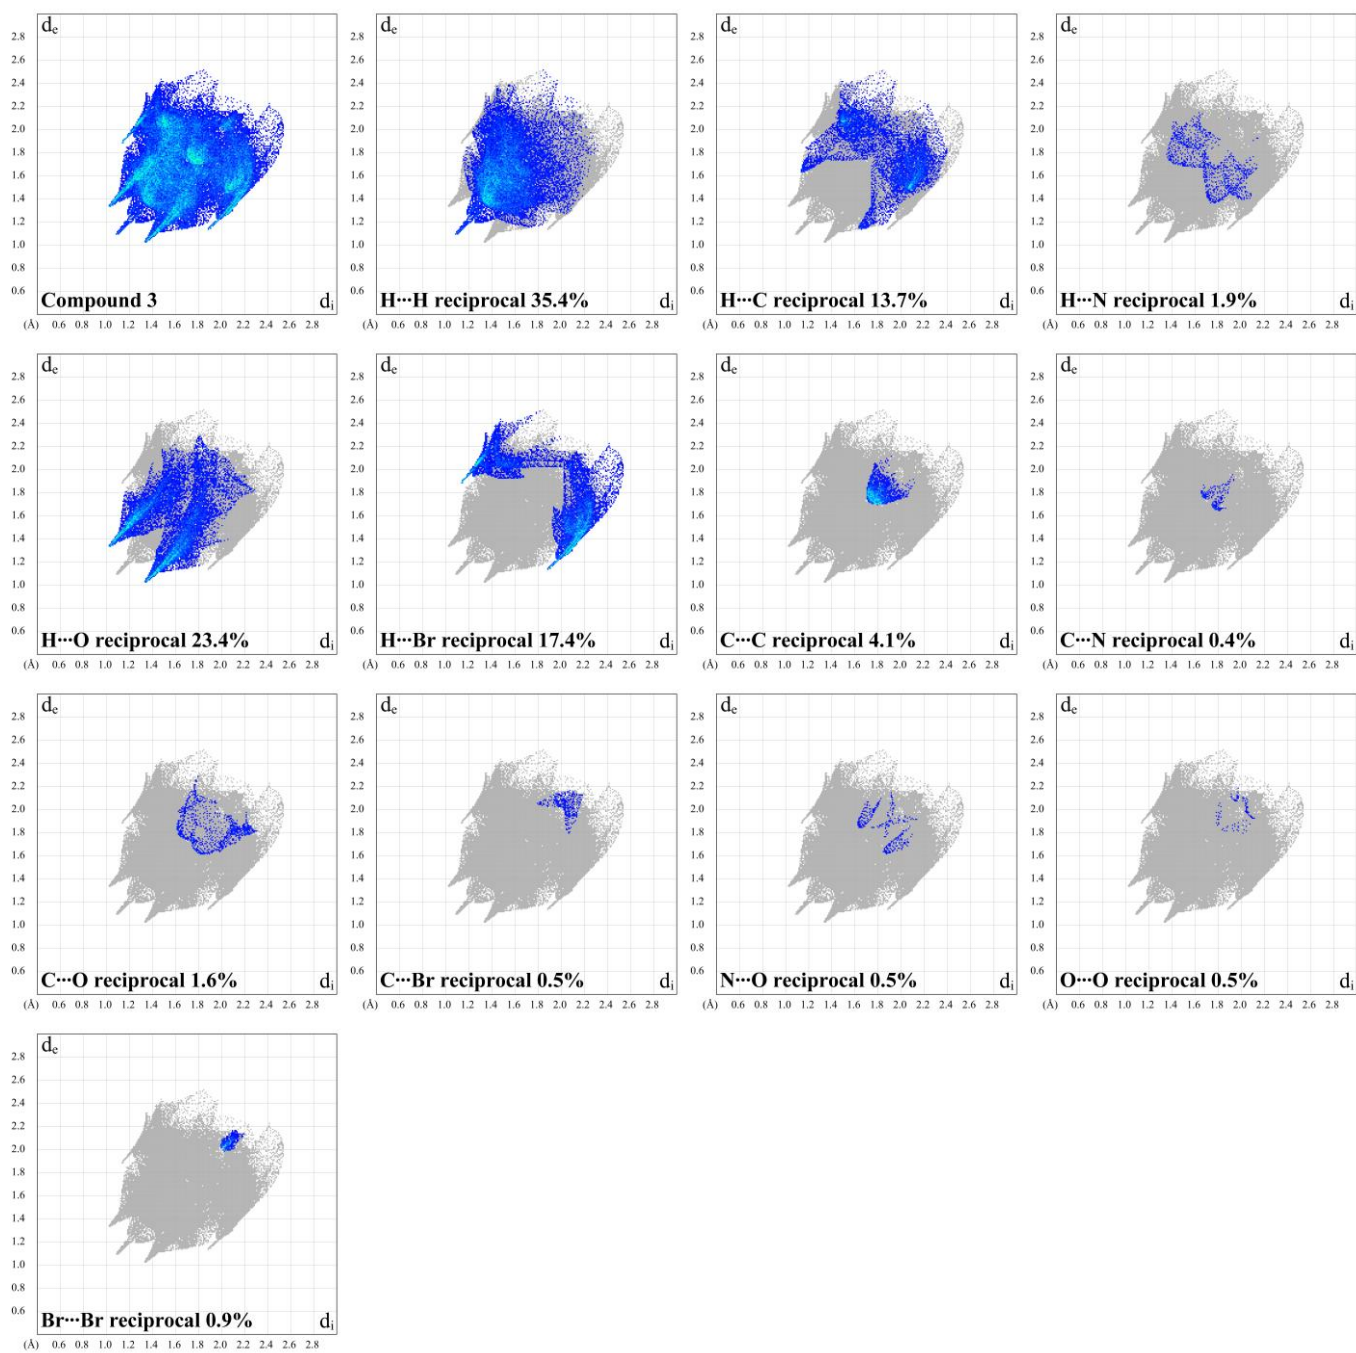

**Figure S3.** 2D and decomposed 2D fingerprint plots of observed contacts for the crystal structure of **3**.

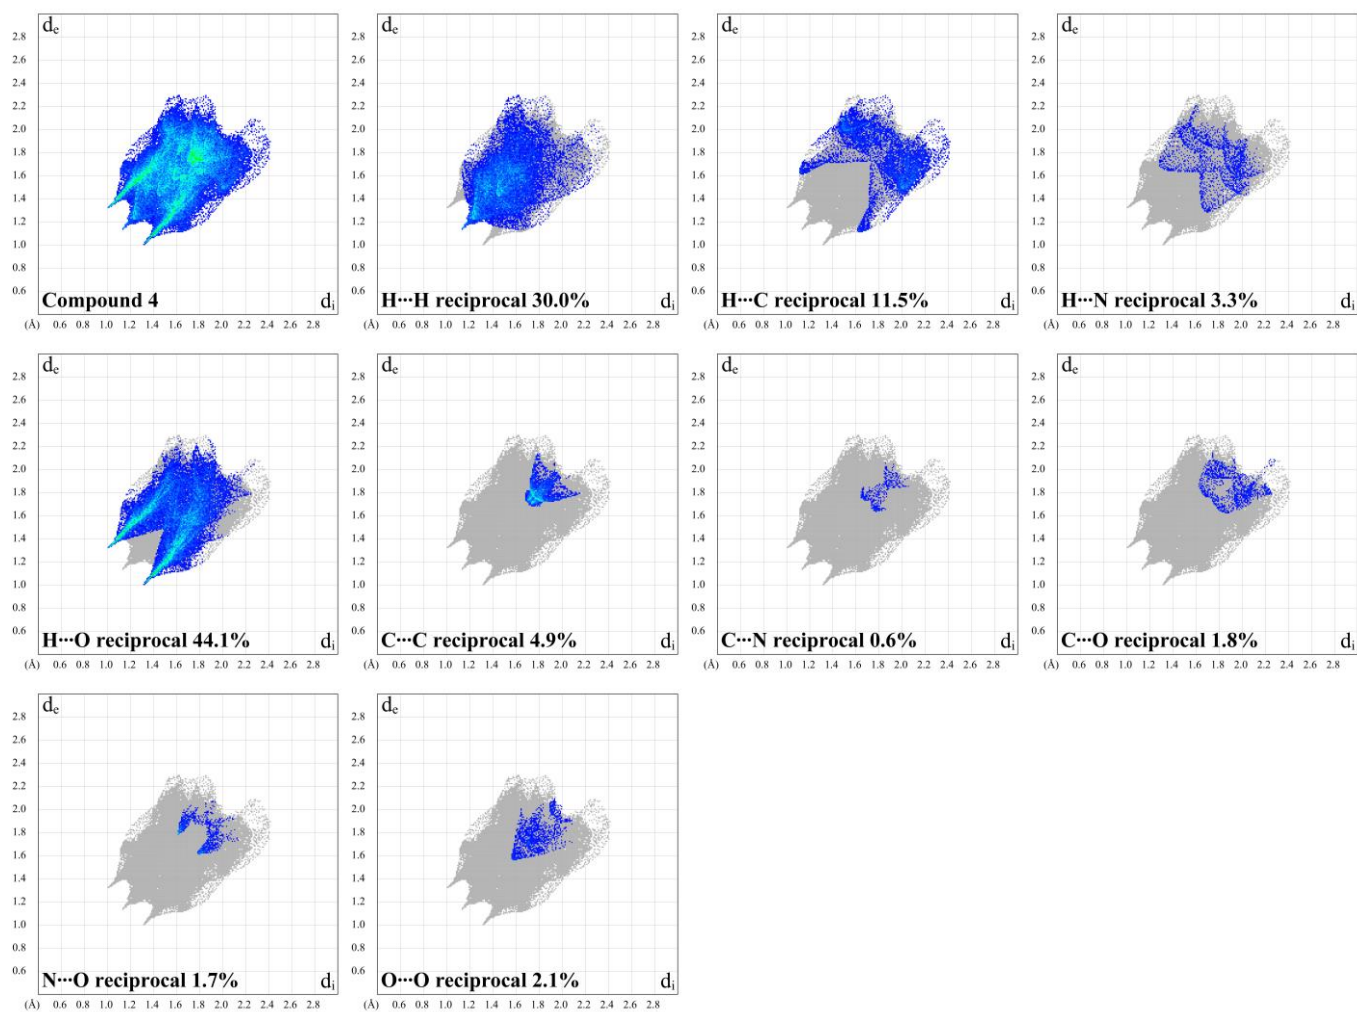

**Figure S4.** 2D and decomposed 2D fingerprint plots of observed contacts for the crystal structure of 4.

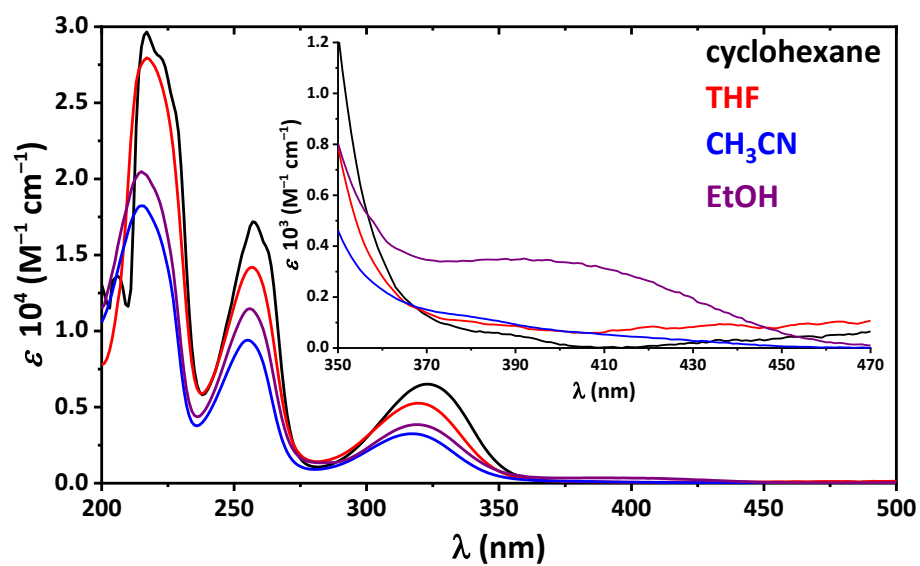

Figure S5. UV-vis spectra of **1** in the applied solvents.

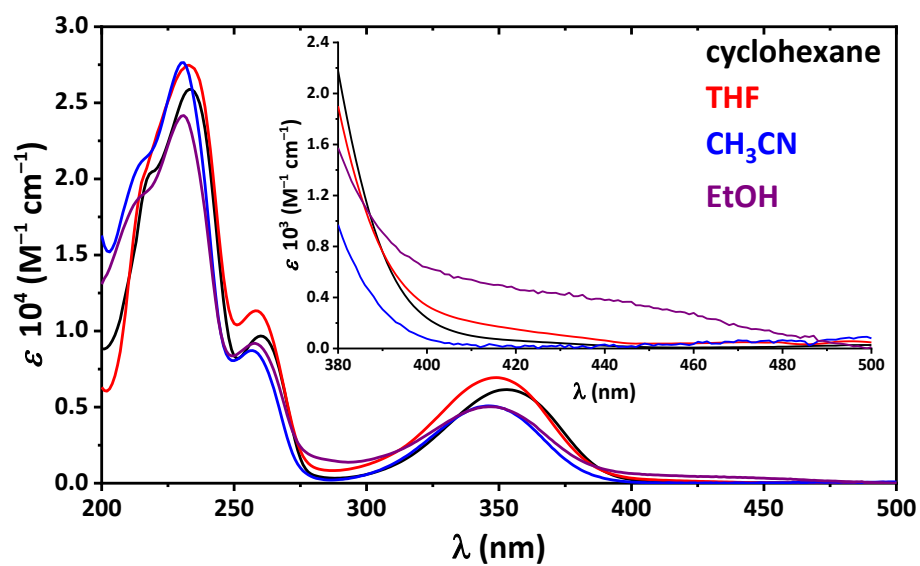

Figure S6. UV-vis spectra of 2 in the applied solvents.

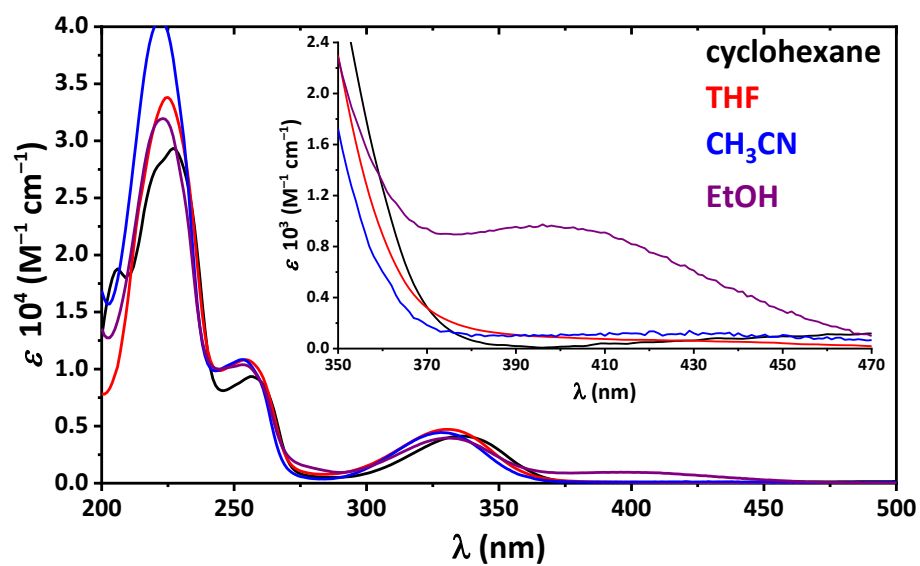

Figure S7. UV-vis spectra of 3 in the applied solvents.



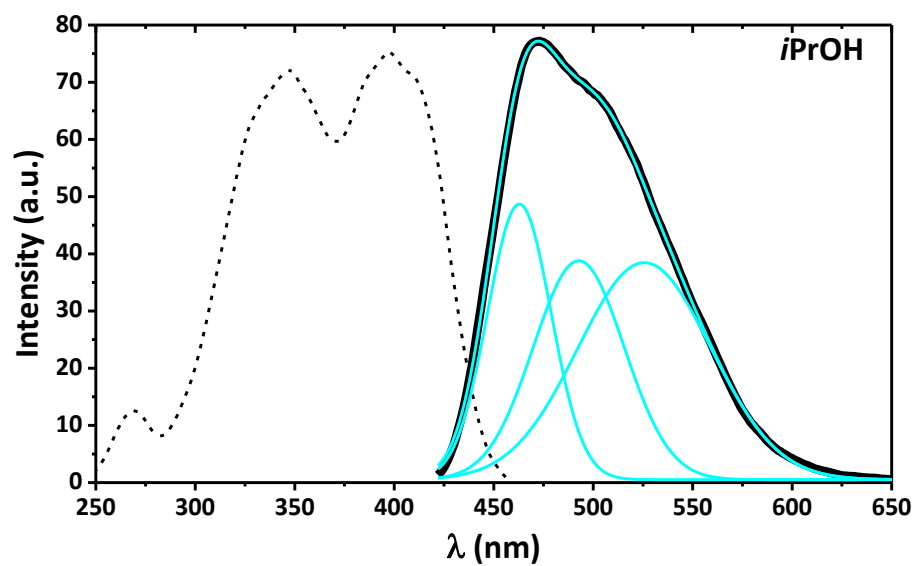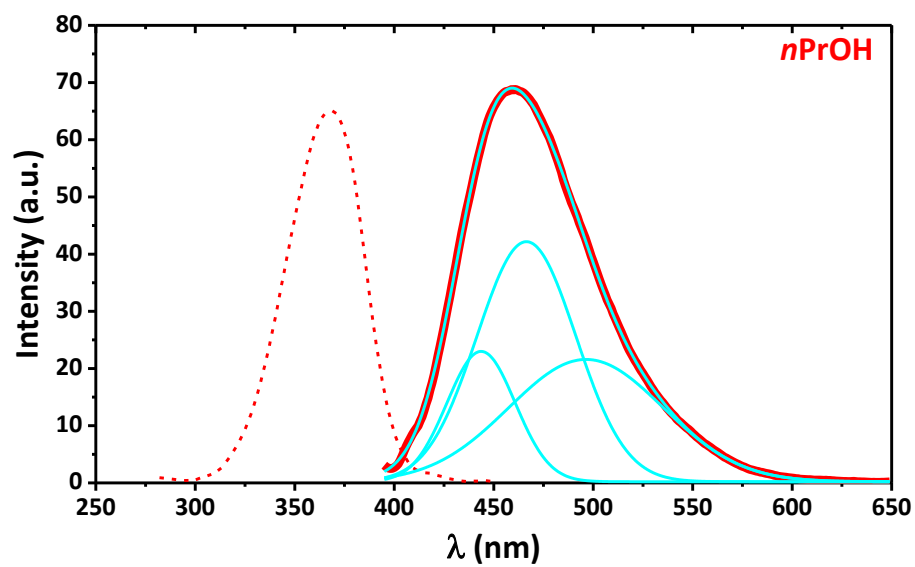

**Figure S8.** Emission (solid line) and excitation (dashed line) spectra of **4** in *n*PrOH ( $\lambda_{\text{exc}} = 360$  nm,  $\lambda_{\text{em}} = 460$  nm) and *i*PrOH ( $\lambda_{\text{exc}} = 400$  nm,  $\lambda_{\text{em}} = 475$  nm).

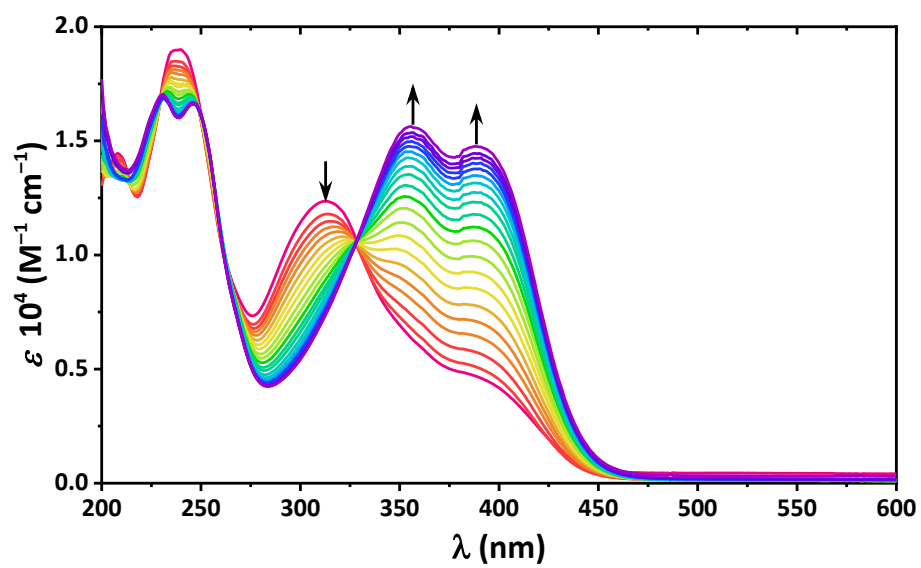

**Figure S9.** UV-vis spectra of **4** in EtOH upon gradual addition of NEt<sub>3</sub> up to 2 eqv. with a step of 0.1 eqv.

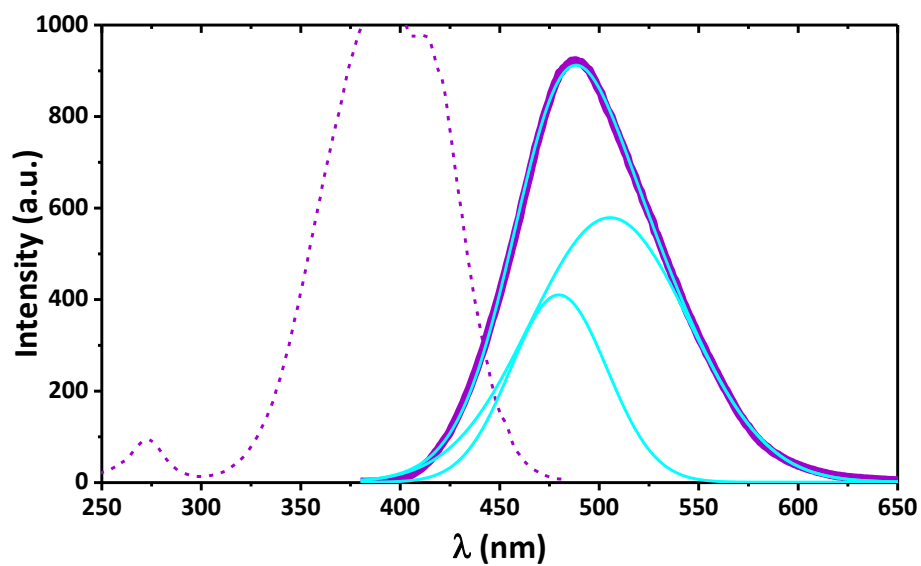

**Figure S10.** Emission (solid line) and excitation (dashed line) spectra of **3** in EtOH after addition of 5 eqv. of NaOH ( $\lambda_{\text{exc}} = 375$  nm,  $\lambda_{\text{em}} = 490$  nm).

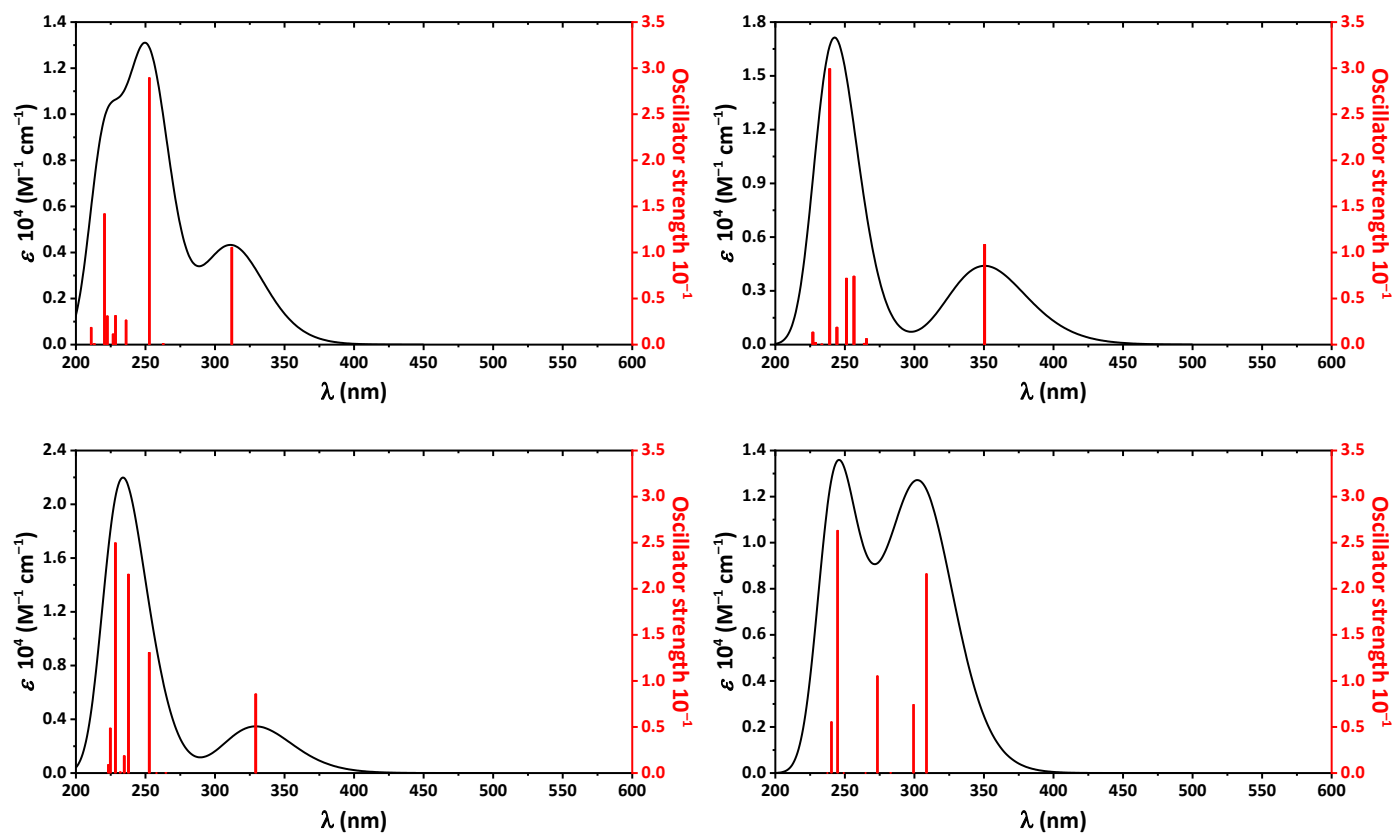

Figure S11. The calculated UV-vis spectra of the ground states of the enol-imine tautomers of **1** (top left), **2** (top right), **3** (bottom left) and **4** (bottom right), obtained by using the TD-DFT/B3LYP/6-311++G(d,p) method.

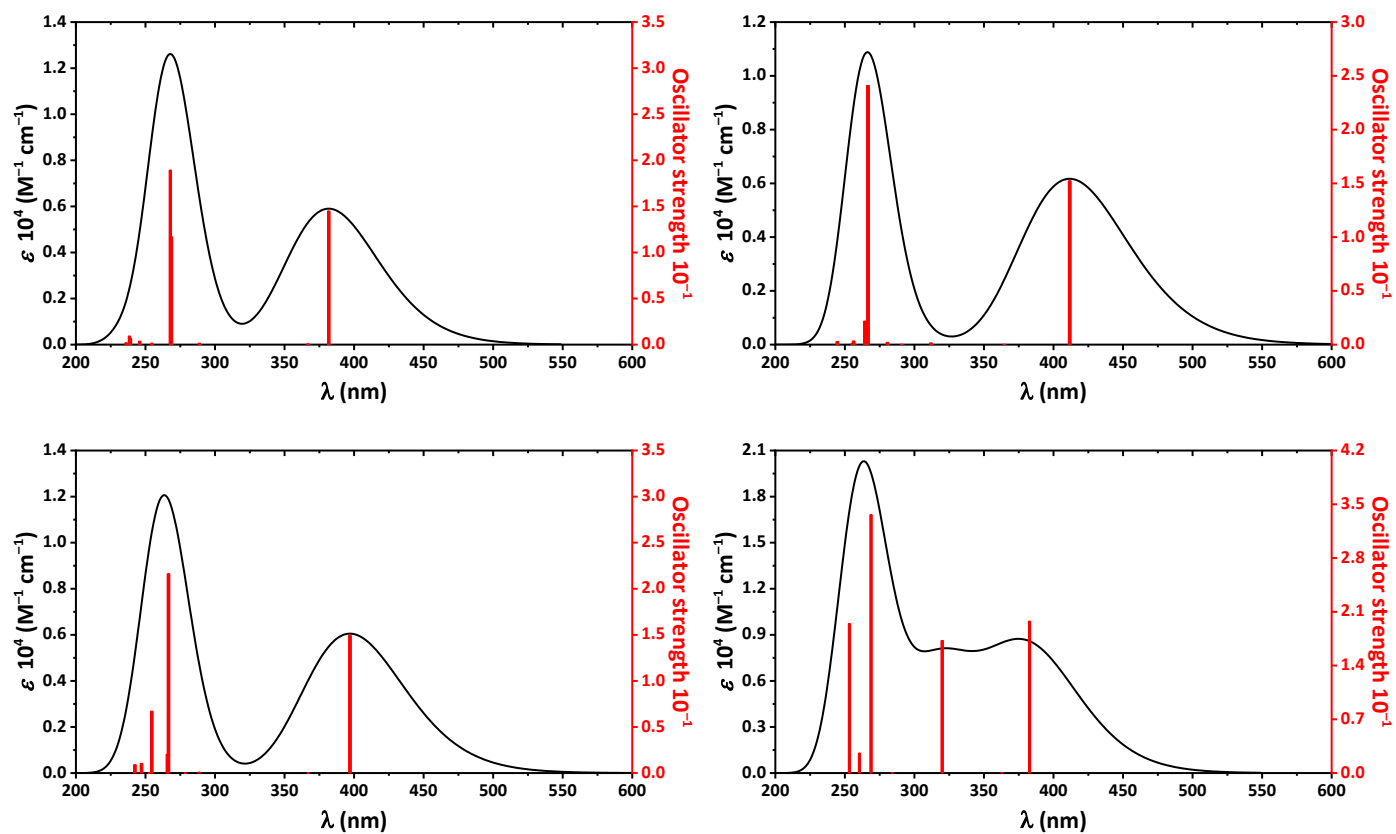

**Figure S12.** The calculated UV-vis spectra of the ground states of the *cis*-keto-enamine tautomers of **1** (top left), **2** (top right), **3** (bottom left) and **4** (bottom right), obtained by using the TD-DFT/B3LYP/6-311++G(d,p) method.

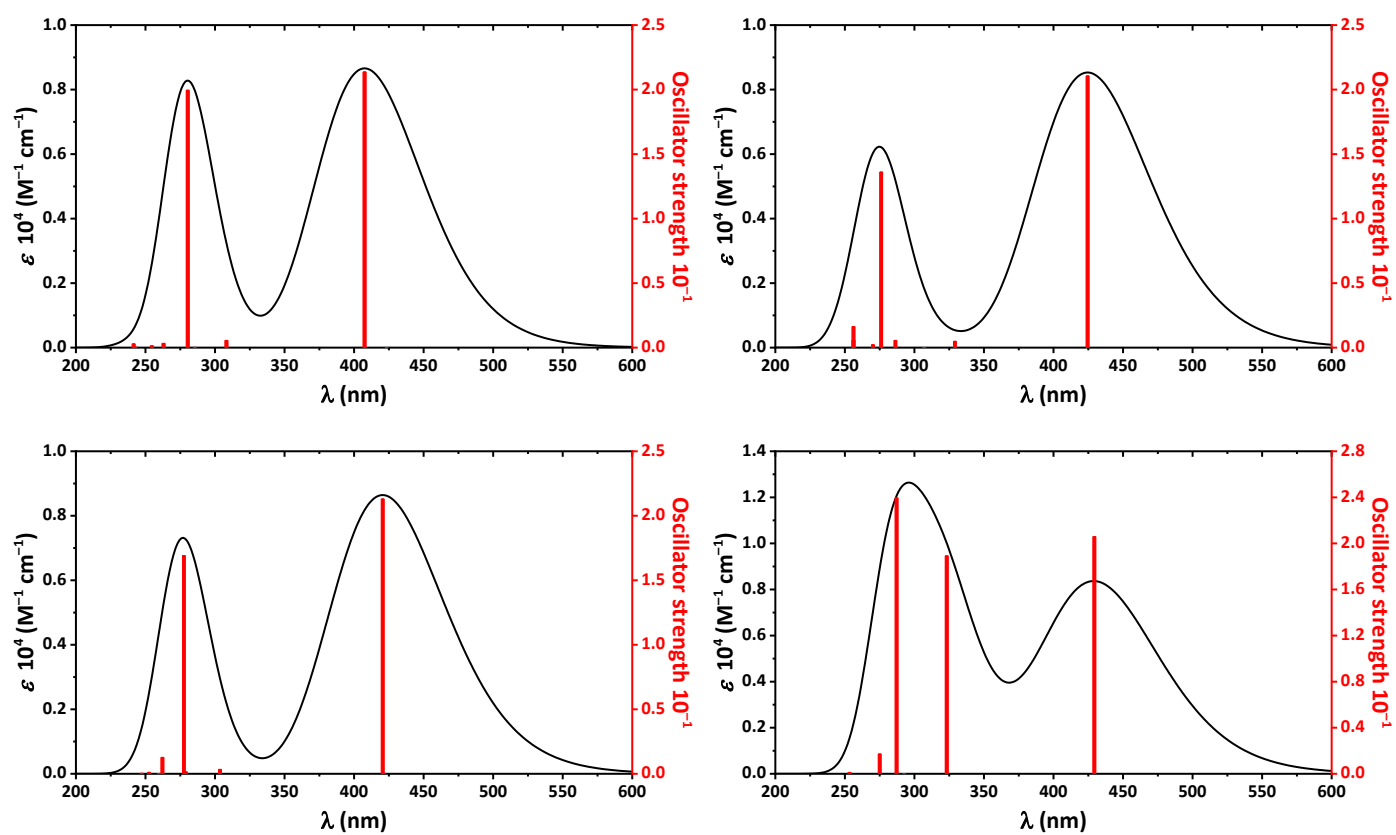

**Figure S13.** The calculated UV-vis spectra of the ground states of the *trans*-keto-enamine tautomers of **1** (top left), **2** (top right), **3** (bottom left) and **4** (bottom right), obtained by using the TD-DFT/B3LYP/6-311++G(d,p) method.

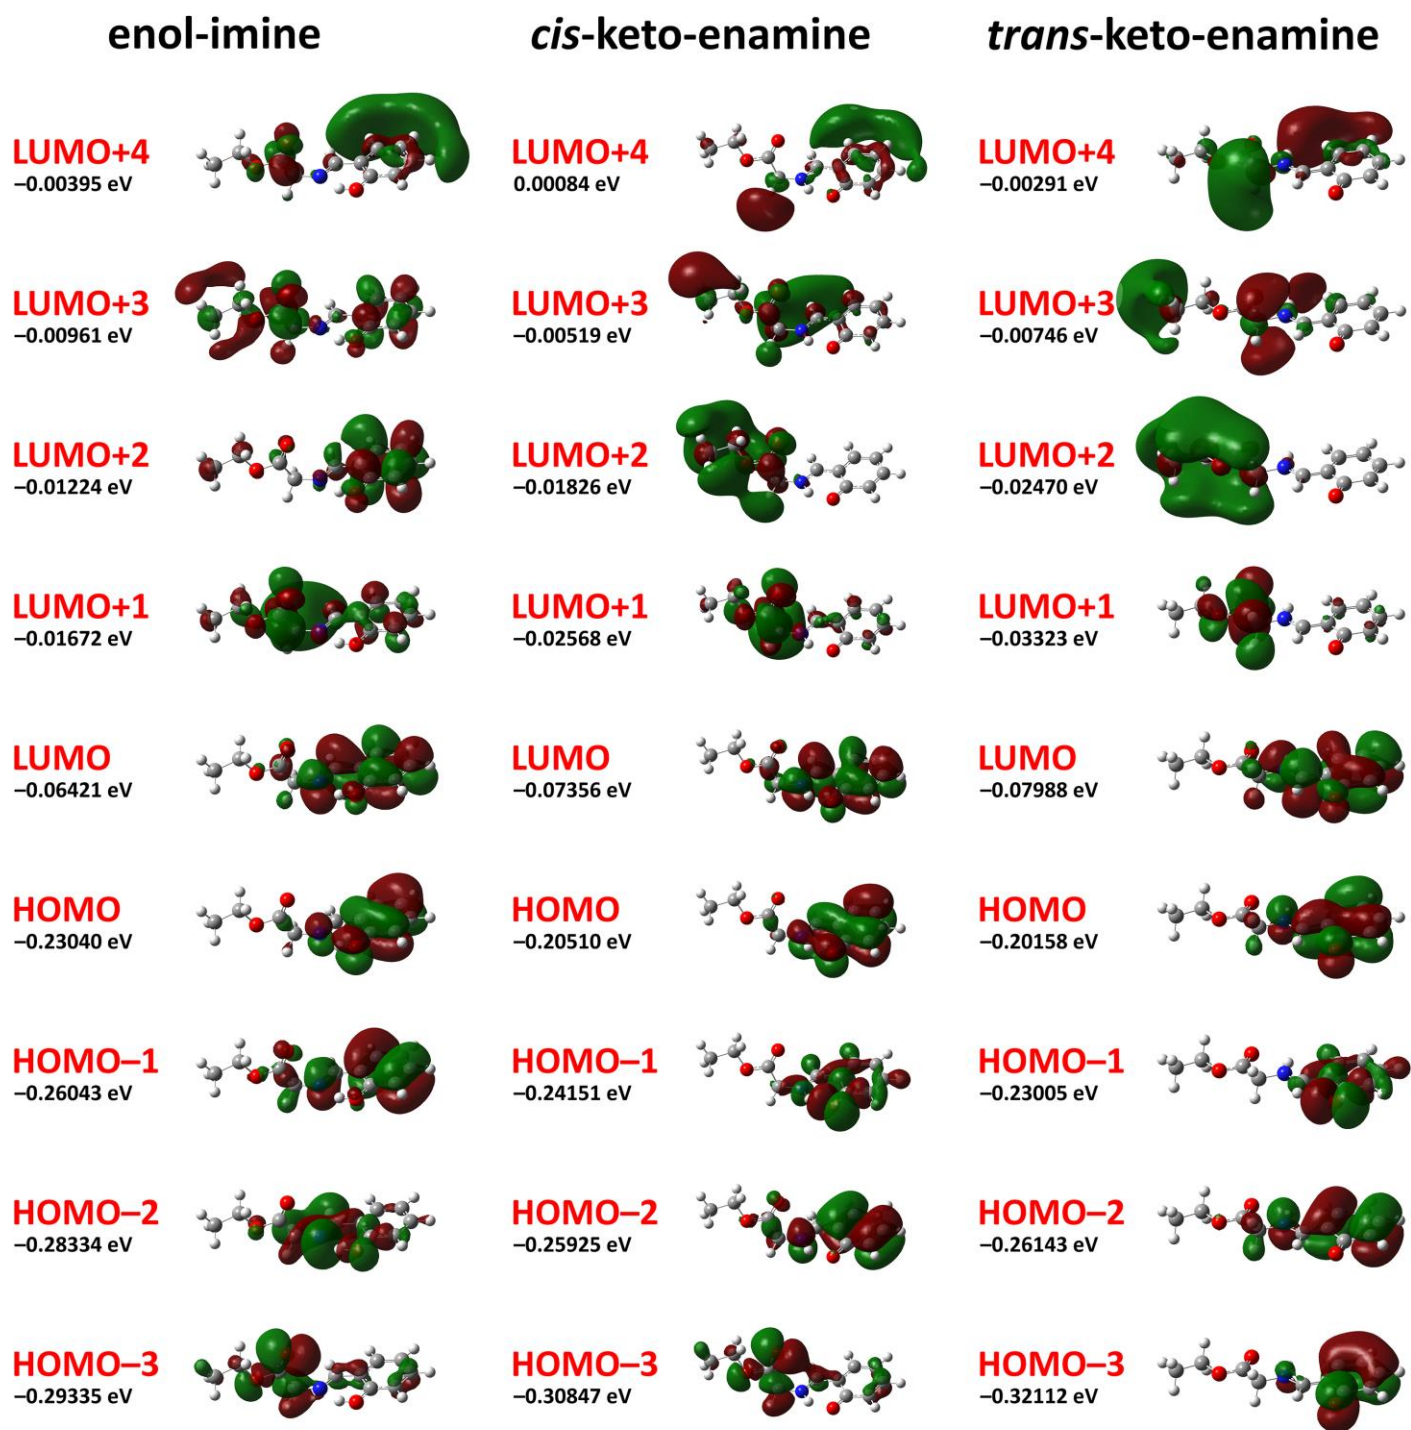

**Figure S14.** Energy levels and views on the electronic isosurfaces of the selected molecular orbitals of the ground state of **1**, obtained by using the B3LYP/6-311++G(d,p) method.

**enol-imine*****cis*-keto-enamine*****trans*-keto-enamine****LUMO+4**  
-0.00453 eV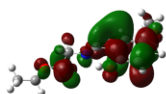**LUMO+4**  
-0.00137 eV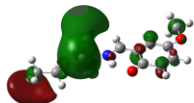**LUMO+4**  
-0.00368 eV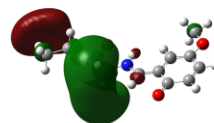**LUMO+3**  
-0.00907 eV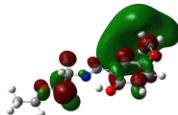**LUMO+3**  
-0.00835 eV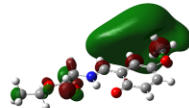**LUMO+3**  
-0.01034 eV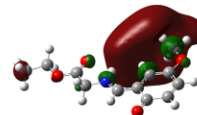**LUMO+2**  
-0.01062 eV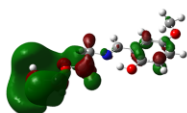**LUMO+2**  
-0.01708 eV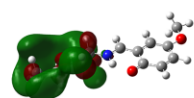**LUMO+2**  
-0.02379 eV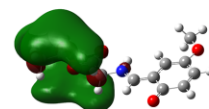**LUMO+1**  
-0.01765 eV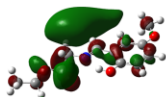**LUMO+1**  
-0.02407 eV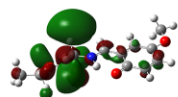**LUMO+1**  
-0.03084 eV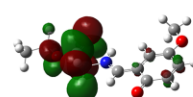**LUMO**  
-0.06388 eV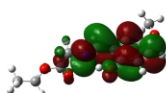**LUMO**  
-0.07108 eV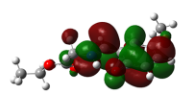**LUMO**  
-0.07497 eV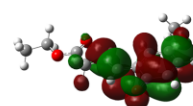**HOMO**  
-0.21087 eV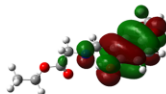**HOMO**  
-0.19161 eV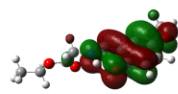**HOMO**  
-0.19035 eV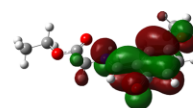**HOMO-1**  
-0.26062 eV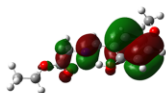**HOMO-1**  
-0.24118 eV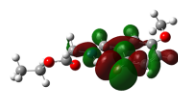**HOMO-1**  
-0.23135 eV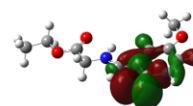**HOMO-2**  
-0.28168 eV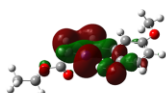**HOMO-2**  
-0.25989 eV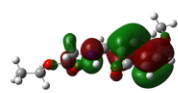**HOMO-2**  
-0.26232 eV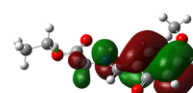**HOMO-3**  
-0.29206 eV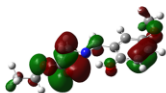**HOMO-3**  
-0.28684 eV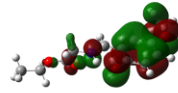**HOMO-3**  
-0.28526 eV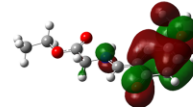

**Figure S15.** Energy levels and views on the electronic isosurfaces of the selected molecular orbitals of the ground state of **2**, obtained by using the B3LYP/6-311++G(d,p) method.



**enol-imine*****cis*-keto-enamine*****trans*-keto-enamine****LUMO+4**  
-0.01295 eV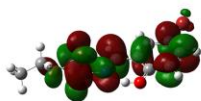**LUMO+4**  
-0.00887 eV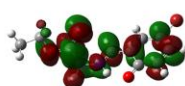**LUMO+4**  
-0.00937 eV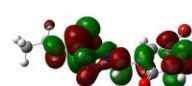**LUMO+3**  
-0.01755 eV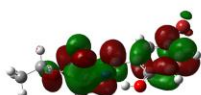**LUMO+3**  
-0.01310 eV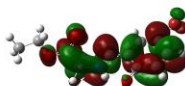**LUMO+3**  
-0.01504 eV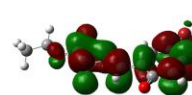**LUMO+2**  
-0.02076 eV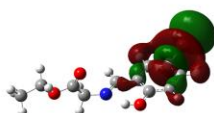**LUMO+2**  
-0.02150 eV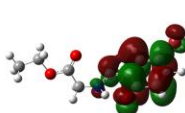**LUMO+2**  
-0.02670 eV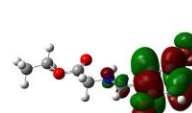**LUMO+1**  
-0.02533 eV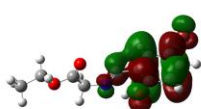**LUMO+1**  
-0.03016 eV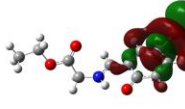**LUMO+1**  
-0.03669 eV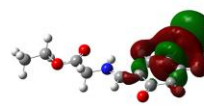**LUMO**  
-0.07426 eV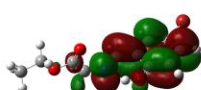**LUMO**  
-0.08356 eV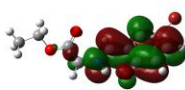**LUMO**  
-0.08963 eV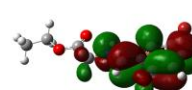**HOMO**  
-0.23196 eV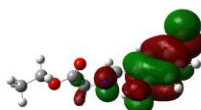**HOMO**  
-0.20980 eV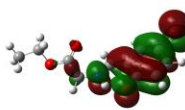**HOMO**  
-0.20722 eV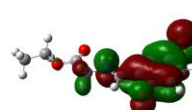**HOMO-1**  
-0.27293 eV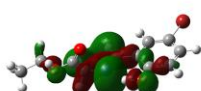**HOMO-1**  
-0.25163 eV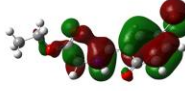**HOMO-1**  
-0.24042 eV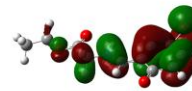**HOMO-2**  
-0.29187 eV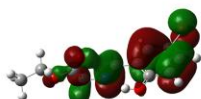**HOMO-2**  
-0.27166 eV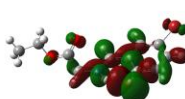**HOMO-2**  
-0.27379 eV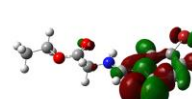**HOMO-3**  
-0.29624 eV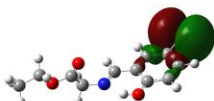**HOMO-3**  
-0.28851 eV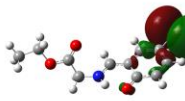**HOMO-3**  
-0.28805 eV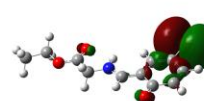

**Figure S16.** Energy levels and views on the electronic isosurfaces of the selected molecular orbitals of the ground state of **3**, obtained by using the B3LYP/6-311++G(d,p) method.

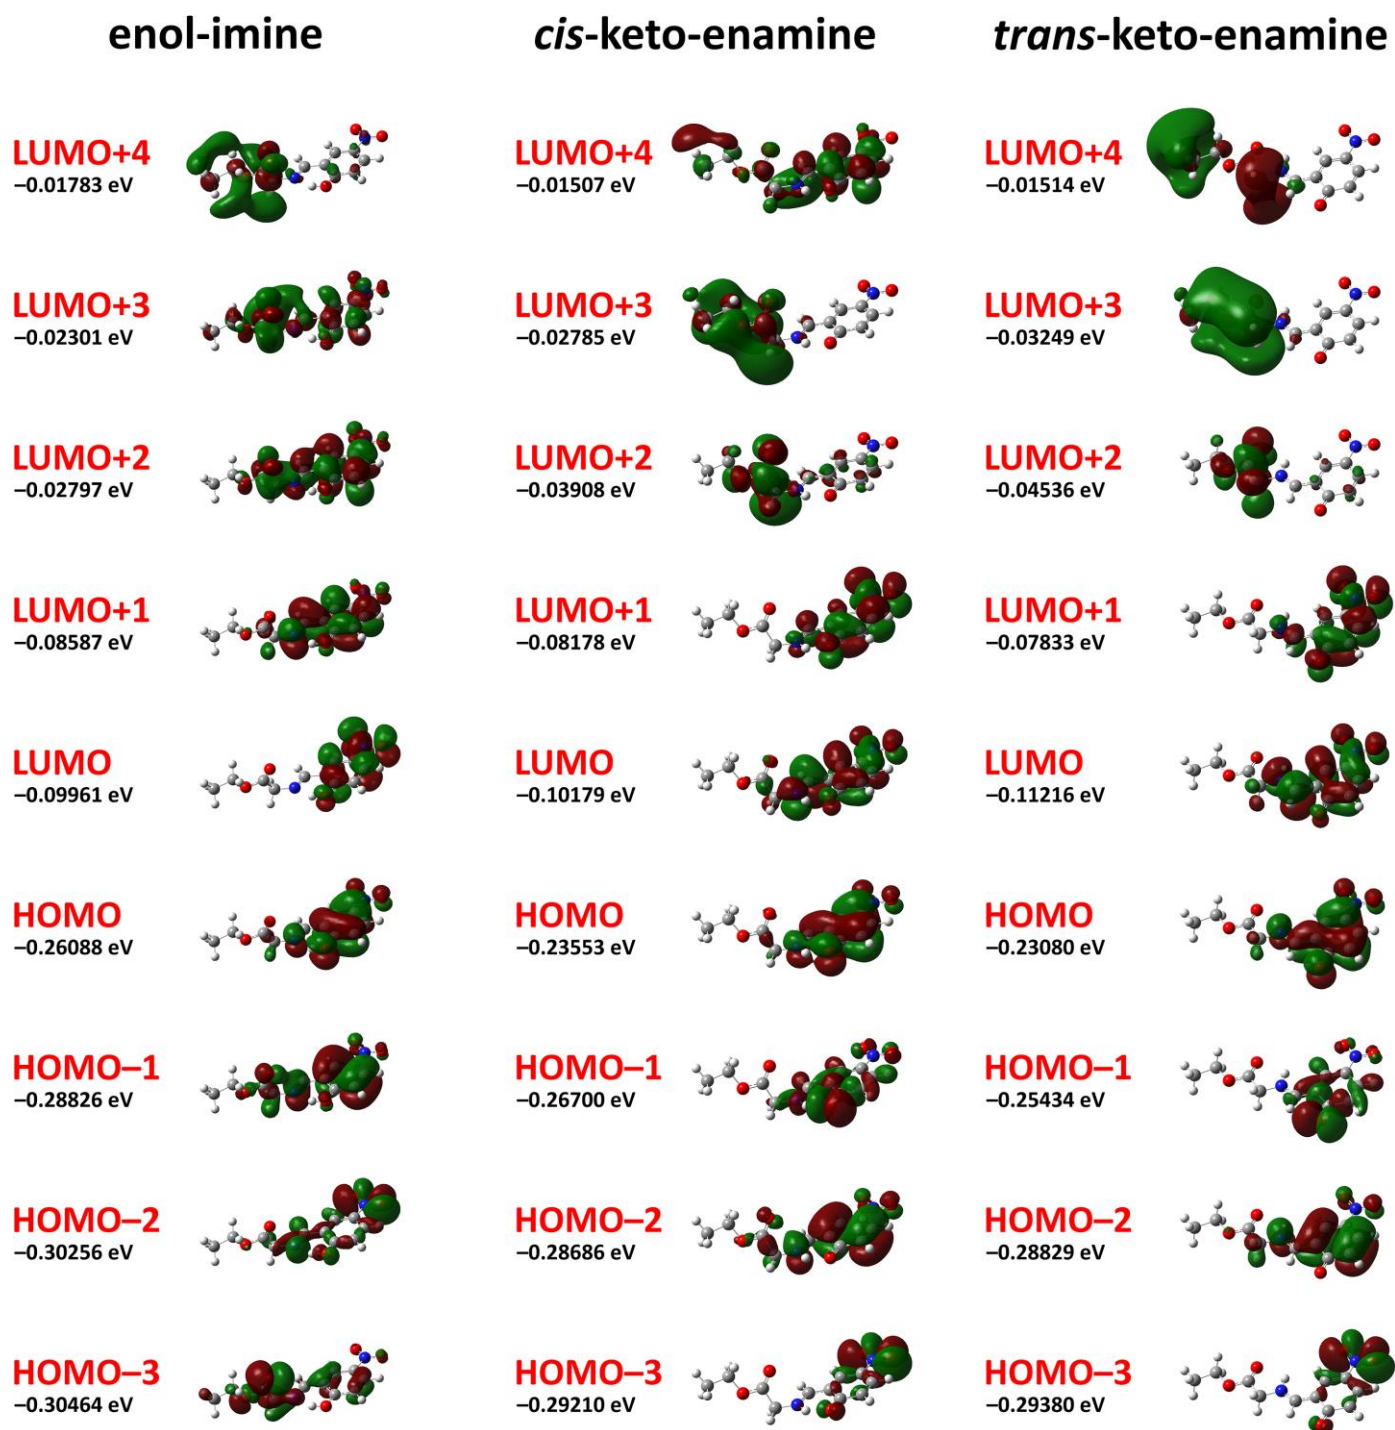

**Figure S17.** Energy levels and views on the electronic isosurfaces of the selected molecular orbitals of the ground state of **4**, obtained by using the B3LYP/6-311++G(d,p) method.

**Table S1.** Values for the main maxima in the experimental UV-vis spectra of **1–4** in different solvents, and in the calculated UV-vis spectra of the ground state for different tautomers of **1–4**, obtained by using the TD-DFT/B3LYP/6-311++G(d,p) method.

|          | Experimental $\lambda_{\text{max}}$ (nm) |                    |                    |                    | Calculated $\lambda_{\text{max}}$ (nm) |                          |                            |
|----------|------------------------------------------|--------------------|--------------------|--------------------|----------------------------------------|--------------------------|----------------------------|
|          | cyclohexane                              | THF                | CH <sub>3</sub> CN | EtOH               | enol-imine                             | <i>cis</i> -keto-enamine | <i>trans</i> -keto-enaimne |
| <b>1</b> | 217, 257, 323                            | 217, 257, 320      | 215, 256, 319      | 215, 255, 317, 392 | 225, 250, 311                          | 268, 382                 | 280, 407                   |
| <b>2</b> | 233, 260, 353                            | 233, 258, 349      | 231, 257, 346      | 231, 258, 347, 418 | 243, 351                               | 266, 412                 | 274, 424                   |
| <b>3</b> | 227, 257, 336                            | 225, 254, 331      | 222, 253, 328      | 223, 253, 330, 396 | 234, 329                               | 263, 397                 | 277, 420                   |
| <b>4</b> | 217, 236, 255, 307, 351                  | 217, 237, 316, 397 | 217, 238, 318, 404 | 209, 240, 313, 389 | 245, 302                               | 264, 323, 375            | 295, 428                   |

**Table S2.** Values for the calculated UV-vis spectra of the ground state for the *cis*-keto-enamine tautomers of **1–4**, obtained by using the TD-DFT/B3LYP/6-311++G(d,p) method.

| <b>1</b>              |                     |                                                                                                                                                                                    | <b>2</b>              |                     |                                                                                                                                                                                   |
|-----------------------|---------------------|------------------------------------------------------------------------------------------------------------------------------------------------------------------------------------|-----------------------|---------------------|-----------------------------------------------------------------------------------------------------------------------------------------------------------------------------------|
| $\lambda_{\max}$ (nm) | Oscillator strength | Transitions                                                                                                                                                                        | $\lambda_{\max}$ (nm) | Oscillator strength | Transitions                                                                                                                                                                       |
| 238.5                 | 0.0092              | HOMO $\rightarrow$ LUMO+3 (2.9%)<br>HOMO $\rightarrow$ LUMO+5 (35.8%)<br>HOMO $\rightarrow$ LUMO+6 (46.4%)<br>HOMO $\rightarrow$ LUMO+8 (8.8%)                                     | 244.6                 | 0.0028              | HOMO $\rightarrow$ LUMO+5 (13.7%)<br>HOMO $\rightarrow$ LUMO+7 (3.2%)<br>HOMO $\rightarrow$ LUMO+8 (68.8%)<br>HOMO $\rightarrow$ LUMO+9 (12.6%)                                   |
| 239.2                 | 0.0068              | HOMO $\rightarrow$ LUMO+4 (5.5%)<br>HOMO $\rightarrow$ LUMO+5 (47.2%)<br>HOMO $\rightarrow$ LUMO+6 (35.5%)<br>HOMO $\rightarrow$ LUMO+8 (3.4%)                                     | 256.3                 | 0.0033              | HOMO-3 $\rightarrow$ LUMO (4.8%)<br>HOMO $\rightarrow$ LUMO+4 (9.6%)<br>HOMO $\rightarrow$ LUMO+6 (76.9%)                                                                         |
| 267.9                 | 0.1893              | HOMO-2 $\rightarrow$ LUMO (55.6%)<br>HOMO $\rightarrow$ LUMO+2 (32.9%)<br>HOMO $\rightarrow$ LUMO+3 (4.1%)                                                                         | 264.4                 | 0.0218              | HOMO-2 $\rightarrow$ LUMO (9.5%)<br>HOMO $\rightarrow$ LUMO+2 (3.7%)<br>HOMO $\rightarrow$ LUMO+3 (3.0%)<br>HOMO $\rightarrow$ LUMO+4 (72.0%)<br>HOMO $\rightarrow$ LUMO+6 (7.6%) |
| 268.6                 | 0.1169              | HOMO-2 $\rightarrow$ LUMO (35.3%)<br>HOMO $\rightarrow$ LUMO+2 (52.5%)<br>HOMO $\rightarrow$ LUMO+3 (7.5%)                                                                         | 266.6                 | 0.2410              | HOMO-2 $\rightarrow$ LUMO (79.4%)<br>HOMO $\rightarrow$ LUMO+4 (6.0%)<br>HOMO $\rightarrow$ LUMO+6 (3.2%)<br>HOMO $\rightarrow$ LUMO+14 (4.5%)                                    |
| 381.8                 | 0.1450              | HOMO $\rightarrow$ LUMO (97.6%)                                                                                                                                                    | 411.6                 | 0.1523              | HOMO $\rightarrow$ LUMO (98.8%)                                                                                                                                                   |
| <b>3</b>              |                     |                                                                                                                                                                                    | <b>4</b>              |                     |                                                                                                                                                                                   |
| $\lambda_{\max}$ (nm) | Oscillator strength | Transitions                                                                                                                                                                        | $\lambda_{\max}$ (nm) | Oscillator strength | Transitions                                                                                                                                                                       |
| 247.1                 | 0.0103              | HOMO-3 $\rightarrow$ LUMO (38.1%)<br>HOMO $\rightarrow$ LUMO+2 (4.2%)<br>HOMO $\rightarrow$ LUMO+3 (2.2%)<br>HOMO $\rightarrow$ LUMO+4 (46.5%)<br>HOMO $\rightarrow$ LUMO+6 (2.1%) | 253.2                 | 0.1945              | HOMO-3 $\rightarrow$ LUMO (7.2%)<br>HOMO-3 $\rightarrow$ LUMO+1 (83.5%)                                                                                                           |
| 254.5                 | 0.0670              | HOMO-3 $\rightarrow$ LUMO (46.7%)<br>HOMO $\rightarrow$ LUMO+4 (34.2%)<br>HOMO $\rightarrow$ LUMO+5 (13.5%)                                                                        | 260.4                 | 0.0259              | HOMO-2 $\rightarrow$ LUMO (2.7%)<br>HOMO $\rightarrow$ LUMO+2 (94.5%)                                                                                                             |
| 265.8                 | 0.0204              | HOMO-2 $\rightarrow$ LUMO (6.6%)<br>HOMO $\rightarrow$ LUMO+2 (81.5%)<br>HOMO $\rightarrow$ LUMO+4 (6.0%)<br>HOMO $\rightarrow$ LUMO+5 (2.8%)                                      | 268.8                 | 0.3364              | HOMO-2 $\rightarrow$ LUMO (80.4%)<br>HOMO-2 $\rightarrow$ LUMO+1 (8.8%)<br>HOMO $\rightarrow$ LUMO+1 (2.6%)<br>HOMO $\rightarrow$ LUMO+2 (2.1%)                                   |
| 266.6                 | 0.2162              | HOMO-2 $\rightarrow$ LUMO (81.6%)<br>HOMO $\rightarrow$ LUMO+2 (6.2%)<br>HOMO $\rightarrow$ LUMO+4 (2.3%)<br>HOMO $\rightarrow$ LUMO+10 (5.6%)                                     | 320.0                 | 0.1726              | HOMO-2 $\rightarrow$ LUMO (2.7%)<br>HOMO $\rightarrow$ LUMO+1 (95.3%)                                                                                                             |
| 397.1                 | 0.1493              | HOMO $\rightarrow$ LUMO (98.6%)                                                                                                                                                    | 382.8                 | 0.1977              | HOMO $\rightarrow$ LUMO (97.7%)                                                                                                                                                   |

**Table S3.** Values for the calculated UV-vis spectra of the ground state for the *trans*-keto-enamine tautomers of **1–4**, obtained by using the TD-DFT/B3LYP/6-311++G(d,p) method.

| 1                     |                     |                                                                                                                                               | 2                     |                     |                                                                                                                                                                                                                        |
|-----------------------|---------------------|-----------------------------------------------------------------------------------------------------------------------------------------------|-----------------------|---------------------|------------------------------------------------------------------------------------------------------------------------------------------------------------------------------------------------------------------------|
| $\lambda_{\max}$ (nm) | Oscillator strength | Transitions                                                                                                                                   | $\lambda_{\max}$ (nm) | Oscillator strength | Transitions                                                                                                                                                                                                            |
| 241.5                 | 0.0029              | HOMO–3 $\rightarrow$ LUMO (2.2%)<br>HOMO $\rightarrow$ LUMO+5 (80.3%)<br>HOMO $\rightarrow$ LUMO+7 (14.7%)                                    | 256.2                 | 0.0058              | HOMO $\rightarrow$ LUMO+5 (54.9%)<br>HOMO $\rightarrow$ LUMO+6 (19.5%)<br>HOMO $\rightarrow$ LUMO+7 (16.4%)<br>HOMO $\rightarrow$ LUMO+8 (3.1%)                                                                        |
| 263.0                 | 0.0033              | HOMO $\rightarrow$ LUMO+2 (6.1%)<br>HOMO $\rightarrow$ LUMO+3 (40.8%)<br>HOMO $\rightarrow$ LUMO+4 (45.3%)<br>HOMO $\rightarrow$ LUMO+6(6.2%) | 256.2                 | 0.0163              | HOMO–3 $\rightarrow$ LUMO (2.8%)<br>HOMO–2 $\rightarrow$ LUMO (2.7%)<br>HOMO $\rightarrow$ LUMO+5 (18.2%)<br>HOMO $\rightarrow$ LUMO+6 (58.8%)<br>HOMO $\rightarrow$ LUMO+7 (5.6%)<br>HOMO $\rightarrow$ LUMO+8 (9.1%) |
| 280.4                 | 0.1995              | HOMO–2 $\rightarrow$ LUMO (92.7%)<br>HOMO $\rightarrow$ LUMO+10 (3.3%)                                                                        | 276.1                 | 0.1361              | HOMO–3 $\rightarrow$ LUMO (2.3%)<br>HOMO–2 $\rightarrow$ LUMO (87.3%)<br>HOMO $\rightarrow$ LUMO+8 (3.4%)                                                                                                              |
| 308.2                 | 0.0056              | HOMO $\rightarrow$ LUMO+1 (99.2%)                                                                                                             | 329.1                 | 0.0049              | HOMO $\rightarrow$ LUMO+1 (99.4%)                                                                                                                                                                                      |
| 407.5                 | 0.2137              | HOMO $\rightarrow$ LUMO (98.9%)                                                                                                               | 424.5                 | 0.2106              | HOMO $\rightarrow$ LUMO (99.6%)<br>HOMO $\leftarrow$ LUMO (2.1%)                                                                                                                                                       |
| 3                     |                     |                                                                                                                                               | 4                     |                     |                                                                                                                                                                                                                        |
| $\lambda_{\max}$ (nm) | Oscillator strength | Transitions                                                                                                                                   | $\lambda_{\max}$ (nm) | Oscillator strength | Transitions                                                                                                                                                                                                            |
| 262.2                 | 0.0127              | HOMO–3 $\rightarrow$ LUMO (85.3%)<br>HOMO $\rightarrow$ LUMO+6 (8.4%)<br>HOMO $\rightarrow$ LUMO+7 (4.1%)                                     | 253.4                 | 0.0012              | HOMO $\rightarrow$ LUMO+3 (91.0%)<br>HOMO $\rightarrow$ LUMO+4 (7.5%)                                                                                                                                                  |
| 277.6                 | 0.1691              | HOMO–2 $\rightarrow$ LUMO (90.9%)<br>HOMO $\rightarrow$ LUMO+10 (5.4%)                                                                        | 275.0                 | 0.0172              | HOMO $\rightarrow$ LUMO+2 (97.1%)                                                                                                                                                                                      |
| 279.2                 | 0.0014              | HOMO $\rightarrow$ LUMO+2 (85.9%)<br>HOMO $\rightarrow$ LUMO+3 (3.8%)<br>HOMO $\rightarrow$ LUMO+4 (9.0%)                                     | 287.2                 | 0.2395              | HOMO–2 $\rightarrow$ LUMO (89.4%)<br>HOMO $\rightarrow$ LUMO+1 (2.3%)<br>HOMO $\rightarrow$ LUMO+2 (2.1%)                                                                                                              |
| 303.5                 | 0.0034              | HOMO $\rightarrow$ LUMO+1 (99.2%)                                                                                                             | 323.2                 | 0.1892              | HOMO–2 $\rightarrow$ LUMO (2.4%)<br>HOMO $\rightarrow$ LUMO+1 (95.4%)                                                                                                                                                  |
| 420.6                 | 0.2130              | HOMO $\rightarrow$ LUMO (99.3%)                                                                                                               | 429.4                 | 0.2059              | HOMO $\rightarrow$ LUMO (98.6%)                                                                                                                                                                                        |

**Table S4.** Cartesian atomic coordinates for the optimized structures of **1**, obtained by using the DFT/B3LYP/6–311++G(d,p) method.

| enol-imine tautomer |           |           |           | <i>cis</i> -keto-enamine tautomer |           |           |           | <i>trans</i> -keto-enamine tautomer |           |           |           |
|---------------------|-----------|-----------|-----------|-----------------------------------|-----------|-----------|-----------|-------------------------------------|-----------|-----------|-----------|
| Atom                | <i>x</i>  | <i>y</i>  | <i>z</i>  | Atom                              | <i>x</i>  | <i>y</i>  | <i>z</i>  | Atom                                | <i>x</i>  | <i>y</i>  | <i>z</i>  |
| C1                  | 3.909396  | 1.198362  | −0.284570 | C1                                | 3.981774  | 0.949362  | −0.623489 | C1                                  | 4.682733  | 0.410773  | 0.000266  |
| C2                  | 2.582566  | 0.911321  | 0.060196  | C2                                | 2.605675  | 0.945330  | −0.192517 | C2                                  | 3.363638  | 1.039599  | −0.000075 |
| C3                  | 2.176368  | −0.441352 | 0.200683  | C3                                | 2.094958  | −0.335779 | 0.304993  | C3                                  | 2.215010  | 0.094719  | −0.000054 |
| C4                  | 3.119888  | −1.461892 | −0.012678 | C4                                | 2.940319  | −1.484665 | 0.345542  | C4                                  | 2.444855  | −1.322040 | −0.000006 |
| C5                  | 4.429927  | −1.171073 | −0.354208 | C5                                | 4.238918  | −1.419191 | −0.074729 | C5                                  | 3.706285  | −1.831199 | −0.000074 |
| C6                  | 4.816417  | 0.168955  | −0.488022 | C6                                | 4.750267  | −0.180559 | −0.562312 | C6                                  | 4.833370  | −0.939677 | 0.000001  |
| H7                  | 4.200241  | 2.236738  | −0.387751 | H7                                | 4.377526  | 1.886799  | −0.996346 | H7                                  | 5.535531  | 1.079739  | 0.000811  |
| H8                  | 2.801043  | −2.494282 | 0.093019  | H8                                | 2.528469  | −2.419478 | 0.715723  | H8                                  | 1.599624  | −2.005122 | 0.000226  |
| H9                  | 5.145456  | −1.967546 | −0.517088 | H9                                | 4.877421  | −2.293362 | −0.044172 | H9                                  | 3.870874  | −2.901892 | 0.000190  |
| H10                 | 5.839513  | 0.409438  | −0.755743 | H10                               | 5.782879  | −0.138163 | −0.895403 | H10                                 | 5.831587  | −1.367363 | 0.000614  |
| O11                 | 1.732175  | 1.930610  | 0.250156  | O11                               | 1.882005  | 1.979527  | −0.236728 | O11                                 | 3.220815  | 2.269251  | −0.000319 |
| H12                 | 0.845257  | 1.544671  | 0.473692  | C12                               | 0.767894  | −0.430547 | 0.731637  | C12                                 | 0.962383  | 0.673786  | 0.000037  |
| C13                 | 0.809711  | −0.783498 | 0.554377  | H13                               | 0.381052  | −1.382302 | 1.088863  | N13                                 | −0.227733 | 0.059690  | −0.000236 |
| H14                 | 0.581679  | −1.855079 | 0.636066  | N14                               | −0.062441 | 0.602075  | 0.732853  | C14                                 | −1.492461 | 0.764786  | 0.000199  |
| N15                 | −0.093198 | 0.100551  | 0.768076  | C15                               | −1.454562 | 0.534380  | 1.100500  | H15                                 | −1.599284 | 1.405861  | 0.882381  |
| C16                 | −1.433182 | −0.330052 | 1.093510  | H16                               | −1.831444 | 1.542630  | 1.269667  | H16                                 | −1.599211 | 1.407088  | −0.880989 |
| H17                 | −1.827595 | 0.271687  | 1.914389  | H17                               | −1.582745 | −0.015324 | 2.040688  | C17                                 | −2.629847 | −0.241886 | −0.000122 |
| H18                 | −1.472028 | −1.38535  | 1.407309  | C18                               | −2.326870 | −0.164612 | 0.052879  | O18                                 | −2.469530 | −1.439254 | −0.000720 |
| C19                 | −2.374614 | −0.201486 | −0.103166 | O19                               | −1.923543 | −0.947817 | −0.766806 | O19                                 | −3.811366 | 0.376711  | 0.000518  |
| O20                 | −2.043943 | −0.284450 | −1.257249 | O20                               | −3.610270 | 0.189646  | 0.214440  | C20                                 | −4.999183 | −0.469649 | 0.000922  |
| O21                 | −3.642034 | −0.029178 | 0.316622  | C21                               | −4.579747 | −0.448561 | −0.665476 | H21                                 | −4.961828 | −1.107926 | 0.885771  |
| C22                 | −4.664091 | 0.024755  | −0.714557 | H22                               | −4.295960 | −0.234882 | −1.697709 | H22                                 | −4.961027 | −1.109977 | −0.882382 |
| H23                 | −4.423553 | 0.843958  | −1.395213 | H23                               | −4.519661 | −1.528587 | −0.515133 | C23                                 | −6.207350 | 0.441426  | −0.000646 |
| H24                 | −4.629527 | −0.906423 | −1.284724 | C24                               | −5.945504 | 0.104286  | −0.319392 | H24                                 | −7.117871 | −0.163250 | −0.000434 |
| C25                 | −5.998477 | 0.225049  | −0.027416 | H25                               | −5.980847 | 1.185453  | −0.469186 | H25                                 | −6.219996 | 1.079523  | 0.885420  |
| H26                 | −6.011165 | 1.158004  | 0.540278  | H26                               | −6.698718 | −0.355478 | −0.964554 | H26                                 | −6.219133 | 1.077559  | −0.888144 |
| H27                 | −6.793032 | 0.269195  | −0.777015 | H27                               | −6.206520 | −0.111639 | 0.718936  | H27                                 | −0.301080 | −0.950557 | −0.000676 |
| H28                 | −6.216967 | −0.599250 | 0.655122  | H28                               | 0.381363  | 1.462296  | 0.345584  | H28                                 | 0.939993  | 1.761002  | 0.000346  |

**Table S5.** Cartesian atomic coordinates for the optimized structures of **2**, obtained by using the DFT/B3LYP/6-311++G(d,p) method.

| Enol-imine tautomer |           |           |           | Cis-keto-enamine tautomer |           |           |           | Trans-keto-enamine tautomer |           |           |           |
|---------------------|-----------|-----------|-----------|---------------------------|-----------|-----------|-----------|-----------------------------|-----------|-----------|-----------|
| Atom                | x         | y         | z         | Atom                      | x         | y         | z         | Atom                        | x         | y         | z         |
| C1                  | -2.989397 | 1.990841  | -0.370350 | C1                        | -3.110512 | 1.896766  | -0.575500 | C1                          | -3.415254 | 0.902318  | 0.000118  |
| C2                  | -1.704654 | 1.563907  | -0.003463 | C2                        | -1.749093 | 1.661443  | -0.148794 | C2                          | -2.094066 | 0.574314  | 0.000040  |
| C3                  | -1.496217 | 0.197373  | 0.285550  | C3                        | -1.446651 | 0.297305  | 0.280940  | C3                          | -1.687681 | -0.810127 | -0.000035 |
| C4                  | -2.576175 | -0.709830 | 0.198120  | C4                        | -2.459542 | -0.720852 | 0.269516  | C4                          | -2.697840 | -1.895336 | 0.000167  |
| C5                  | -3.838165 | -0.271998 | -0.168258 | C5                        | -3.726691 | -0.426054 | -0.145919 | C5                          | -4.091451 | -1.443757 | 0.000146  |
| C6                  | -4.034434 | 1.090855  | -0.451231 | C6                        | -4.041611 | 0.902802  | -0.570203 | C6                          | -4.419917 | -0.131086 | 0.000093  |
| H7                  | -3.140552 | 3.040624  | -0.590444 | H7                        | -3.358985 | 2.900106  | -0.900417 | H7                          | -1.339556 | 1.351584  | 0.000204  |
| H8                  | -2.387017 | -1.752357 | 0.421321  | H8                        | -2.186736 | -1.718378 | 0.592390  | H8                          | -4.850482 | -2.217173 | 0.000166  |
| H9                  | -5.027065 | 1.419084  | -0.736265 | H9                        | -5.060025 | 1.092230  | -0.892730 | H9                          | -5.456339 | 0.190163  | 0.000025  |
| O10                 | -0.717079 | 2.474326  | 0.062081  | O10                       | -0.883028 | 2.579386  | -0.147276 | C10                         | -0.373448 | -1.218242 | -0.000371 |
| H11                 | 0.111574  | 1.996114  | 0.321422  | C11                       | -0.154918 | -0.017064 | 0.698704  | H11                         | -0.203096 | -2.291346 | -0.000259 |
| C12                 | -0.186200 | -0.296125 | 0.671371  | H12                       | 0.081734  | -1.032240 | 1.008667  | C12                         | 2.072913  | -0.970822 | -0.000621 |
| H13                 | -0.111757 | -1.372460 | 0.879566  | N13                       | 0.831434  | 0.873763  | 0.751375  | H13                         | 2.268187  | -1.592349 | -0.882254 |
| N14                 | 0.839546  | 0.465894  | 0.776354  | C14                       | 2.191399  | 0.564612  | 1.109726  | H14                         | 2.267463  | -1.593128 | 0.880608  |
| C15                 | 2.109277  | -0.116399 | 1.144559  | H15                       | 2.226786  | -0.046919 | 2.019700  | C15                         | 3.065693  | 0.178170  | 0.000220  |
| H16                 | 1.998917  | -1.112543 | 1.602313  | H16                       | 2.724283  | 1.488918  | 1.332184  | O16                         | 4.320069  | -0.277090 | 0.000797  |
| H17                 | 2.616023  | 0.524207  | 1.868340  | C17                       | 2.952158  | -0.206453 | 0.026153  | C17                         | 5.383349  | 0.720141  | 0.000447  |
| C18                 | 3.019766  | -0.301404 | -0.068831 | O18                       | 2.440491  | -0.854083 | -0.849467 | H18                         | 5.261550  | 1.348761  | 0.884661  |
| O19                 | 2.642272  | -0.526069 | -1.189358 | O19                       | 4.274605  | -0.090202 | 0.224683  | H19                         | 5.260579  | 1.349141  | -0.883381 |
| O20                 | 4.312330  | -0.226994 | 0.299523  | C20                       | 5.139244  | -0.825877 | -0.686283 | C20                         | 6.702972  | -0.020612 | -0.000370 |
| C21                 | 5.297268  | -0.468213 | -0.740909 | H21                       | 4.882433  | -1.885525 | -0.623354 | H21                         | 7.524193  | 0.700738  | -0.000508 |
| H22                 | 5.127567  | -1.465430 | -1.153348 | H22                       | 4.930540  | -0.487871 | -1.703183 | H22                         | 6.800906  | -0.650590 | 0.886190  |
| H23                 | 5.137527  | 0.257338  | -1.541118 | C23                       | 6.571187  | -0.557513 | -0.275234 | H23                         | 6.800131  | -0.650096 | -0.887360 |
| C24                 | 6.668866  | -0.334701 | -0.113333 | H24                       | 6.756685  | -0.894436 | 0.746986  | O24                         | 2.749701  | 1.344434  | 0.000271  |
| H25                 | 6.806062  | -1.061816 | 0.690141  | H25                       | 7.249213  | -1.096561 | -0.942073 | O25                         | -3.934513 | 2.167663  | 0.000256  |
| H26                 | 7.436874  | -0.511879 | -0.870937 | H26                       | 6.804698  | 0.507477  | -0.337898 | C26                         | -3.026041 | 3.256838  | -0.000310 |
| H27                 | 6.816803  | 0.666825  | 0.296425  | O27                       | -4.781265 | -1.301312 | -0.207789 | H27                         | -2.391779 | 3.244804  | -0.894362 |
| O28                 | -4.947591 | -1.067850 | -0.283774 | C28                       | -4.548058 | -2.642391 | 0.186372  | H28                         | -3.635555 | 4.159039  | -0.000640 |
| C29                 | -4.805358 | -2.455041 | -0.024231 | H29                       | -5.495200 | -3.164554 | 0.058973  | H29                         | -2.391728 | 3.245628  | 0.893725  |
| H30                 | -5.791378 | -2.891346 | -0.176127 | H30                       | -3.784519 | -3.116208 | -0.441952 | N30                         | 0.726270  | -0.443811 | -0.000914 |
| H31                 | -4.093336 | -2.921287 | -0.715150 | H31                       | -4.239223 | -2.702369 | 1.236944  | H31                         | 0.661108  | 0.565906  | -0.000735 |
| H32                 | -4.483995 | -2.639225 | 1.007632  | H32                       | 0.540391  | 1.809335  | 0.408055  | O32                         | -2.407114 | -3.098156 | 0.000324  |

**Table S6.** Cartesian atomic coordinates for the optimized structures of **3**, obtained by using the DFT/B3LYP/6–311++G(d,p) method.

| Enol-imine tautomer |           |           |           | Cis-keto-enamine tautomer |           |           |           | Trans-keto-enamine tautomer |           |           |           |
|---------------------|-----------|-----------|-----------|---------------------------|-----------|-----------|-----------|-----------------------------|-----------|-----------|-----------|
| Atom                | x         | y         | z         | Atom                      | x         | y         | z         | Atom                        | x         | y         | z         |
| C1                  | 2.163472  | 2.237242  | −0.288396 | C1                        | 2.299267  | 2.224618  | −0.614265 | C1                          | 3.277298  | 2.202277  | 0.000075  |
| C2                  | 0.903433  | 1.719169  | 0.037718  | C2                        | 0.947509  | 1.930585  | −0.201754 | C2                          | 1.840245  | 2.473959  | 0.000141  |
| C3                  | 0.776869  | 0.335775  | 0.322864  | C3                        | 0.713650  | 0.572264  | 0.291909  | C3                          | 0.973320  | 1.268394  | −0.000040 |
| C4                  | 1.916201  | −0.486263 | 0.270501  | C4                        | 1.777098  | −0.377551 | 0.347911  | C4                          | 1.550814  | −0.045706 | −0.000079 |
| C5                  | 3.148061  | 0.049159  | −0.053641 | C5                        | 3.028667  | −0.023467 | −0.058734 | C5                          | 2.899316  | −0.196681 | 0.000001  |
| C6                  | 3.277031  | 1.412718  | −0.334505 | C6                        | 3.292687  | 1.288773  | −0.543992 | C6                          | 3.775924  | 0.939732  | 0.000113  |
| H7                  | 2.246735  | 3.295099  | −0.505330 | H7                        | 2.497190  | 3.223575  | −0.984153 | H7                          | 3.933767  | 3.064489  | −0.000181 |
| H8                  | 1.817369  | −1.543614 | 0.486440  | H8                        | 1.574513  | −1.378219 | 0.712906  | H8                          | 0.915142  | −0.924349 | −0.000315 |
| H9                  | 4.245295  | 1.824978  | −0.588747 | H9                        | 4.298565  | 1.538883  | −0.860446 | H9                          | 4.846585  | 0.771943  | −0.000183 |
| O10                 | −0.144810 | 2.551601  | 0.071621  | O10                       | 0.025593  | 2.789077  | −0.259640 | O10                         | 1.392033  | 3.626332  | 0.000342  |
| H11                 | −0.947659 | 2.015724  | 0.305762  | C11                       | −0.568524 | 0.196653  | 0.706315  | C11                         | −0.387619 | 1.506322  | −0.000224 |
| C12                 | −0.510615 | −0.248419 | 0.665555  | H12                       | −0.747312 | −0.814332 | 1.063710  | N12                         | −1.380192 | 0.610193  | 0.000277  |
| H13                 | −0.520603 | −1.329070 | 0.862114  | N13                       | −1.598287 | 1.028521  | 0.693140  | C13                         | −2.784426 | 0.968748  | −0.000531 |
| N14                 | −1.581903 | 0.448005  | 0.741463  | C14                       | −2.947763 | 0.667757  | 1.053541  | H14                         | −3.050734 | 1.562297  | 0.880777  |
| C15                 | −2.825084 | −0.206781 | 1.076248  | H15                       | −3.545001 | 1.573320  | 1.154800  | H15                         | −3.050380 | 1.560011  | −0.883520 |
| H16                 | −3.323979 | 0.336984  | 1.881614  | H16                       | −2.971219 | 0.161568  | 2.025888  | C16                         | −3.623669 | −0.297882 | 0.000783  |
| H17                 | −2.678245 | −1.242858 | 1.419529  | C17                       | −3.615101 | −0.270879 | 0.043118  | O17                         | −3.156977 | −1.412039 | 0.002146  |
| C18                 | −3.769299 | −0.269539 | −0.122710 | O18                       | −3.025878 | −0.962856 | −0.745639 | O18                         | −4.923986 | −0.006187 | 0.000082  |
| O19                 | −3.430706 | −0.236219 | −1.276638 | O19                       | −4.945182 | −0.240157 | 0.201007  | C19                         | −5.852556 | −1.132345 | 0.000692  |
| O20                 | −5.039621 | −0.412282 | 0.297817  | C20                       | −5.725480 | −1.137738 | −0.641259 | H20                         | −5.650632 | −1.737979 | 0.886113  |
| C21                 | −6.050840 | −0.566969 | −0.734693 | H21                       | −5.517131 | −0.892674 | −1.684402 | H21                         | −5.648436 | −1.740871 | −0.882230 |
| H22                 | −6.015326 | 0.309552  | −1.384836 | H22                       | −5.385793 | −2.159376 | −0.458954 | C22                         | −7.255437 | −0.565627 | −0.001920 |
| H23                 | −5.798202 | −1.442503 | −1.336981 | C23                       | −7.184008 | −0.945402 | −0.286058 | H23                         | −7.977731 | −1.385942 | −0.001489 |
| C24                 | −7.390895 | −0.713946 | −0.045330 | H24                       | −7.500578 | 0.083667  | −0.468666 | H24                         | −7.433644 | 0.047672  | 0.883799  |
| H25                 | −7.621661 | 0.168269  | 0.555759  | H25                       | −7.798713 | −1.607060 | −0.901858 | H25                         | −7.431485 | 0.044852  | −0.890013 |
| H26                 | −8.177042 | −0.832399 | −0.795694 | H26                       | −7.368396 | −1.185412 | 0.763290  | H26                         | −1.195972 | −0.386342 | 0.001514  |
| H27                 | −7.404178 | −1.590679 | 0.605943  | Br27                      | 4.470142  | −1.289974 | 0.009429  | H27                         | −0.685178 | 2.552198  | −0.000784 |
| Br28                | 4.695483  | −1.082949 | −0.119996 | H28                       | −1.347352 | 1.963309  | 0.309682  | Br28                        | 3.689206  | −1.945466 | −0.000287 |



**Table S7.** Cartesian atomic coordinates for the optimized structures of **4**, obtained by using the DFT/B3LYP/6-311++G(d,p) method.

| Enol-imine tautomer |           |           |           | <i>Cis</i> -keto-enamine tautomer |           |           |           | <i>Trans</i> -keto-enamine tautomer |           |           |           |
|---------------------|-----------|-----------|-----------|-----------------------------------|-----------|-----------|-----------|-------------------------------------|-----------|-----------|-----------|
| Atom                | <i>x</i>  | <i>y</i>  | <i>z</i>  | Atom                              | <i>x</i>  | <i>y</i>  | <i>z</i>  | Atom                                | <i>x</i>  | <i>y</i>  | <i>z</i>  |
| C1                  | 2.679264  | 2.027798  | -0.185635 | C1                                | 2.838151  | 1.962604  | -0.570747 | C1                                  | 3.771804  | 1.738400  | -0.000047 |
| C2                  | 1.401628  | 1.525894  | 0.114928  | C2                                | 1.469966  | 1.740071  | -0.160324 | C2                                  | 2.359491  | 2.118085  | 0.000006  |
| C3                  | 1.225730  | 0.127124  | 0.316921  | C3                                | 1.150003  | 0.383116  | 0.304141  | C3                                  | 1.398028  | 0.980399  | 0.000024  |
| C4                  | 2.330295  | -0.721228 | 0.209922  | C4                                | 2.141908  | -0.621229 | 0.338975  | C4                                  | 1.864052  | -0.359168 | 0.000069  |
| C5                  | 3.578379  | -0.198263 | -0.086921 | C5                                | 3.420232  | -0.331319 | -0.063368 | C5                                  | 3.205268  | -0.615574 | 0.000010  |
| C6                  | 3.760725  | 1.175265  | -0.286431 | C6                                | 3.771246  | 0.970112  | -0.523220 | C6                                  | 4.172360  | 0.443210  | -0.000044 |
| H7                  | 2.790236  | 3.094080  | -0.336593 | H7                                | 3.091577  | 2.956558  | -0.918432 | H7                                  | 4.489788  | 2.549528  | -0.000106 |
| H8                  | 2.222961  | -1.788620 | 0.356224  | H8                                | 1.905173  | -1.622318 | 0.678988  | H8                                  | 1.184536  | -1.203739 | 0.000128  |
| H9                  | 4.748963  | 1.548627  | -0.517825 | H9                                | 4.793589  | 1.145429  | -0.831544 | H9                                  | 5.220750  | 0.175329  | -0.000104 |
| O10                 | 0.385848  | 2.379436  | 0.203975  | O10                               | 0.601401  | 2.647497  | -0.193428 | O10                                 | 1.990182  | 3.295336  | 0.000025  |
| H11                 | -0.437072 | 1.853489  | 0.411751  | C11                               | -0.158046 | 0.072540  | 0.712690  | C11                                 | 0.052089  | 1.327661  | 0.000049  |
| C12                 | -0.085428 | -0.427188 | 0.626501  | H12                               | -0.394746 | -0.935630 | 1.042476  | N12                                 | -1.001167 | 0.518840  | -0.000093 |
| H13                 | -0.141576 | -1.516703 | 0.747734  | N13                               | -1.129171 | 0.963045  | 0.723311  | C13                                 | -2.378738 | 0.980236  | -0.000090 |
| N14                 | -1.120789 | 0.312563  | 0.752847  | C14                               | -2.502992 | 0.677845  | 1.069897  | H14                                 | -2.596956 | 1.589028  | 0.882891  |
| C15                 | -2.397550 | -0.297162 | 1.046030  | H15                               | -2.562112 | 0.163106  | 2.035423  | H15                                 | -2.597031 | 1.588888  | -0.883185 |
| H16                 | -2.309383 | -1.366745 | 1.289900  | H16                               | -3.045927 | 1.616163  | 1.175283  | C16                                 | -3.301633 | -0.228741 | -0.000114 |
| H17                 | -2.852761 | 0.198374  | 1.906718  | C17                               | -3.206167 | -0.210410 | 0.037444  | O17                                 | -2.903655 | -1.368959 | -0.000450 |
| C18                 | -3.354919 | -0.185019 | -0.139231 | O18                               | -2.638511 | -0.918206 | -0.753190 | O18                                 | -4.577176 | 0.148143  | 0.000195  |
| O19                 | -3.024936 | -0.013237 | -1.283320 | O19                               | -4.531762 | -0.113333 | 0.180757  | C19                                 | -5.580310 | -0.915370 | -0.000007 |
| O20                 | -4.622206 | -0.346201 | 0.278274  | C20                               | -5.349421 | -0.957891 | -0.684258 | H20                                 | -5.416532 | -1.533786 | 0.884242  |
| C21                 | -5.651318 | -0.339205 | -0.749853 | H21                               | -5.116989 | -0.706442 | -1.720632 | H21                                 | -5.416648 | -1.533356 | -0.884577 |
| H22                 | -5.597927 | 0.612640  | -1.282062 | H22                               | -5.062619 | -1.997514 | -0.514150 | C22                                 | -6.942063 | -0.256909 | 0.000239  |
| H23                 | -5.431054 | -1.136553 | -1.462975 | C23                               | -6.799310 | -0.696734 | -0.339453 | H23                                 | -7.716159 | -1.028462 | 0.000197  |
| C24                 | -6.985994 | -0.537239 | -0.063370 | H24                               | -7.006732 | -0.944050 | 0.703803  | H24                                 | -7.079029 | 0.364654  | 0.887471  |
| H25                 | -7.016919 | -1.490111 | 0.469487  | H25                               | -7.061756 | 0.349670  | -0.508655 | H25                                 | -7.079216 | 0.364935  | -0.886768 |
| H26                 | -7.183912 | 0.266082  | 0.649554  | H26                               | -7.439852 | -1.316628 | -0.972015 | H26                                 | -0.896726 | -0.491412 | -0.000285 |
| H27                 | -7.784085 | -0.536441 | -0.810376 | O27                               | 4.111252  | -2.489000 | 0.387087  | H27                                 | -0.156936 | 2.395343  | 0.000200  |
| O28                 | 4.533950  | -2.300796 | -0.011787 | O28                               | 5.571617  | -1.083152 | -0.394478 | N28                                 | 3.665606  | -1.999794 | 0.000065  |
| O29                 | 5.819657  | -0.608716 | -0.456720 | N29                               | 4.437347  | -1.374811 | -0.020476 | O29                                 | 2.822272  | -2.896191 | 0.000082  |
| N30                 | 4.727812  | -1.102087 | -0.193143 | H30                               | -0.822244 | 1.891342  | 0.364960  | O30                                 | 4.879252  | -2.196286 | 0.000088  |
